# Supplementary material for: Intertwining personal and reward relevance: evidence from the drift-diffusion model
Source: Springer Nature journal article supplement (doi:10.1007/s00426-018-0979-6), 2018-01-24
Supplement: MOESM1 [file 15412668]

**Intertwining personal and reward relevance: evidence from the drift diffusion model**

Yankouskaya, Bührle, Lugt, Stolte, & Sui

**Supplementary results**

**Table S1** The results of Post Hoc comparisons for RT in mismatched pairs for personal associations

| Contrast | **t*-test | Effect size  (Cohen’s d, dz) |
| --- | --- | --- |
| mother vs partner | *t*(38) = 4.2, *p* = .001 | 0.67 |
| self vs partner | *t*(38) = 5.3, *p* < .001 | 0.08 |
| mother vs friend | *t*(38) = 3.9, *p* < .004 | 0.62 |
| self vs friend | *t*(38) = 3.9, *p* = .001 | 0.62 |
| mother vs stranger | *t*(38) = 6.6, *p* < .001 | 1.06 |
| self vs stranger | *t*(38) = 9.2, *p* < .001 | 1.47 |
| partner vs stranger | (*t*(38) = 5.9, *p* < .001 | 0.94 |
| friend vs stranger | *t*(38) = 0.41, *p* = .25 | 0.07 (***BF01* = 7.39) |

*adjusted for multiple comparisons using Bonferroni corrections

***BF01* – a Bayes Factor (evidence for the null hypothesis (H0) over the alternative hypothesis (H1)).

**Table S2** The results of Post Hoc comparisons for RT in mismatched pairs for reward associations

| Contrast | **t*-test | Effect size  (Cohen’s d, dz) |
| --- | --- | --- |
| x9 vs x7 | *t*(38) = 0.82, *p* = 1.0 | 0.13, ***BF01 = 5.78* |
| x9 vs x5 | *t*(38) = .98, *p* = 1.0 | 0.16, *BF01 = 5.04* |
| x9 vs x3 | *t*(38) = 0.35, *p* = .86 | 0.06, *BF01 = 7.55* |
| x7 vs x5 | *t*(38) = 1.5, *p* = .56 | 0.24, *BF01 = 2.75* |
| x7 vs x3 | *t*(38) = 0.20, *p* = .78 | 0.12, *BF01 = 7.86* |
| x5 vs x3 | *t*(38) = 1.2, *p* = .31 | 0.19, *BF01 = 4.01* |

*adjusted for multiple comparisons using Bonferroni corrections

***BF01* – a Bayes Factor (evidence for the null hypothesis (H0) over the alternative hypothesis (H1)).

**Table S3** The results of one-sample t-test for redundancy gains (RT-gains) in mismatched pairs

| Condition | *t*-test | Effect size  (Cohen’s d, dz) | MD (BCa 95% CI)  (msec) |
| --- | --- | --- | --- |
| x9 | *t*(38) = -3.16, p < .001 | 0.51, ***BF01* = 0.07 | -19.8 [-35.1, -10.6] |
| x7 | *t*(38) = -3.24, p < .001 | 0.52, *BF01* = 0.08 | -21.8 [-34.4, -9.5] |
| x5 | *t*(38) = -4.23, *p* < .001 | 0.68, *BF01* = 0.0062 | -28.9 [-42.7, -15.6] |
| x3 | *t*(38) = -4.82, *p* < .001 | 0.77, *BF01* = 0.0011 | -31.1 [-43.4, -18.4] |

**BF01* – a Bayes Factor (evidence for the null hypothesis (H0) over the alternative hypothesis (H1)).

**MD – mean difference, CI – confidence interval

**Table S4** The results of Post Hoc comparisons for perceptual sensitivity analysis in the personal task

| Contrast | **t*-test | Effect size  (Cohen’s d, dz) |
| --- | --- | --- |
| self vs partner | *t*(38) = 2.9, *p* = .057 | 0.46, ***BF01* = 0.19 |
| mother vs partner | *t*(38) = 3.4, *p* = .015 | 0.54, *BF01* = 0.057 |
| self vs stranger | *t*(38) = 3.6, *p* = .01 | 0.58, *BF01* = 0.034 |
| mother vs stranger | *t*(38) = 3.9, *p* = .003 | 0.62, *BF01* = 0.015 |
| self vs mother | *t*(38) = 0.25, *p* = 1.0 | 0.04, *BF01* = 7.77 |
| partner vs friend | *t*(38) = 0.72, *p* = 1.0 | 0.12, *BF01* = 6.23 |
| self vs friend | *t*(38) = 1.37, *p* = .18 | 0.22, *BF01* = 3.27 |
| mother vs friend | *t*(38) = 1.61, *p* = .12 | 0.26, *BF01* = 2.35 |
| friend and stranger | *t*(38) = 2.12, *p* = .041 | 0.34, *BF01* = 1.002 |
| partner and stranger | *t*(38) = 2.12, *p* = .040 | 0.34, *BF01* = 1.002 |

*adjusted for multiple comparisons using Bonferroni corrections

***BF01* – a Bayes Factor (evidence for the null hypothesis (H0) over the alternative hypothesis (H1)).

**Table S5** The results of Post Hoc comparisons for drift rate in the personal task

| Contrast | **t*-test | Effect size  (Cohen’s d, dz) |
| --- | --- | --- |
| self vs partner | *t*(38) = 5.78, *p* < .001 | 0.93, ***BF01* = 6.35e-05 |
| self vs friend | *t*(38) = 4.29, *p* = .001 | 0.69, *BF01* = 0.005 |
| self vs stranger | *t*(38) = 6.59, *p* < .001 | 0.89, *BF01* = 5.74e-06 |
| mother vs partner | *t*(38) = 4.37, *p* = .001 | 0.69, *BF01* = 0.0042 |
| mother vs stranger | *t*(38) = 4.95, *p* < .001 | 0.79, *BF01* = 0.0008 |
| partner vs friend | *t*(38) = 1.34, *p* = .65 | 0.21, *BF01* = 3.39 |
| partner vs stranger | *t*(38) = 2.16, *p* = .37 | 0.35, *BF01* = 0.93 |
| friend vs stranger | *t*(38) = 2.83, *p* = .075 | 0.45, *BF01* = 0.23 |
| self vs mother | *t*(38) = 0.99, *p* = 1.0 | 0.16, *BF01* = 4.99 |
| mother vs friend | *t*(38) = 2.82, *p* = .08 | 0.45, *BF01* = 0.23 |

*adjusted for multiple comparisons using Bonferroni corrections

***BF01* – a Bayes Factor (evidence for the null hypothesis (H0) over the alternative hypothesis (H1)).

**Table S6** The results of Post Hoc comparisons for drift rate in the reward task

| Contrast | **t*-test | Effect size  (Cohen’s d, dz) |
| --- | --- | --- |
| x9 vs x7 | *t*(38) = 3.15, *p* = .032 | 0.50, ***BF01* = 0.11 |
| x9 vs x5 | *t*(38) = 5.62, *p* < .001 | 0.89, *BF01* = 0.0001 |
| x9 vs x3 | *t*(38) = 5.27, *p* < .001 | 0.84, *BF01* = 0.0003 |
| x9 vs x1 | *t*(38) = 2.38, *p* = .22 | 0.38, *BF01* = 0.61 |
| x7 vs x5 | *t*(38) = 1.07, *p* = 1.0 | 0.17, *BF01* = 4.61 |
| x7 vs x3 | *t*(38) = 1.42, *p* = 1.0 | 0.22, *BF01* =3.06 |
| x7 vs x1 | *t*(38) = 0.35, *p* = 1.0 | 0.05, *BF01* = 7.55 |
| x5 vs x3 | *t*(38) = 0.43, *p* = 1.0 | 0.07, *BF01* = 7.33 |
| x5 vs x1 | *t*(38) = 1.52, *p* = 1.0 | 0.24, *BF01* = 2.67 |
| x3 vs x1 | *t*(38) = 1.68, *p* = 1.0 | 0.27, *BF01* = 2.11 |

*adjusted for multiple comparisons using Bonferroni corrections

***BF01* – a Bayes Factor (evidence for the null hypothesis (H0) over the alternative hypothesis (H1)).

**Table S7** The results of Post Hoc comparisons for non-decision time in the personal task

| Contrast | **t*-test | Effect size  (Cohen’s d, dz) |
| --- | --- | --- |
| partner vs self | *t*(38) = 6.51, *p* < .001 | 1.04, ***BF01*= 7.29e-06 |
| partner vs mother | *t*(38) = 5.45, *p* < .001 | 0.87, *BF01* =0.0002 |
| partner vs friend | *t*(38) = 4.39, *p* < .001 | 0.70, *BF01*= 0.004 |
| stranger vs self | *t*(38) = 4.83, *p* < .001 | 0.87, *BF01*= 0.0011 |
| stranger vs mother | *t*(38) = 4.95, *p* < .001 | 0.79, *BF01*= 0.0008 |
| stranger vs friend | *t*(38) = 3.83, *p* < .005 | 0.61, *BF01*= 0.019 |
| mother vs self | *t*(38) = 1.55, *p* = 1.0 | 0.25, *BF01*= 2.56 |
| friend vs self | *t*(38) = 1.75, *p* = .89 | 0.28, *BF01*= 1.89 |
| friend vs mother | *t*(38) = 0.41, *p* = 1.0 | 0.06, *BF01*= 7.38 |
| stranger vs partner | *t*(38) = 0.65, *p* = 1.0 | 0.10, *BF01*= 6.53 |

*adjusted for multiple comparisons using Bonferroni corrections

***BF01* – a Bayes Factor (evidence for the null hypothesis (H0) over the alternative hypothesis (H1)).

**Table S8** The results of Post Hoc comparisons for non-decision time in the reward task

| Contrast | **t*-test | Effect size  (Cohen’s d, dz) |
| --- | --- | --- |
| x9 vs x7 | *t*(38) = 3.82, *p* = .005 | 0.61, ***BF01*= 0.019 |
| x9 vs x5 | *t*(38) = 5.04, *p* < .001 | 0.81, *BF01*= 0.006 |
| x9 vs x3 | *t*(38) = 4.25, *p* < .001 | 0.68, *BF01*= 0.006 |
| x1 vs x3 | *t*(38) = 3.59, *p* = .009 | 0.57, *BF01*= 0.035 |
| x1 vs x5 | *t*(38) = 3.45, *p* = .014 | 0.55, *BF01*= 0.051 |
| x7 vs x5 | *t*(38) = 1.31, *p* = 1.0 | 0.21, *BF01*= 3.53 |
| x7 vs x3 | *t*(38) = 0.85, *p* = 1.0 | 0.14, *BF01*= 5.65 |
| x5 vs x3 | *t*(38) = 0.52, *p* < .005 | 0.08, *BF01*= 7.03 |

*adjusted for multiple comparisons using Bonferroni corrections

***BF01* – a Bayes Factor (evidence for the null hypothesis (H0) over the alternative hypothesis (H1)).
